# Supplementary material
Source: Springer Nature journal article supplement (https://www.springermedizin.de/resource/supplementary/12865_2008_234_MOESM4_ESM.pdf/9427568)

**A.**

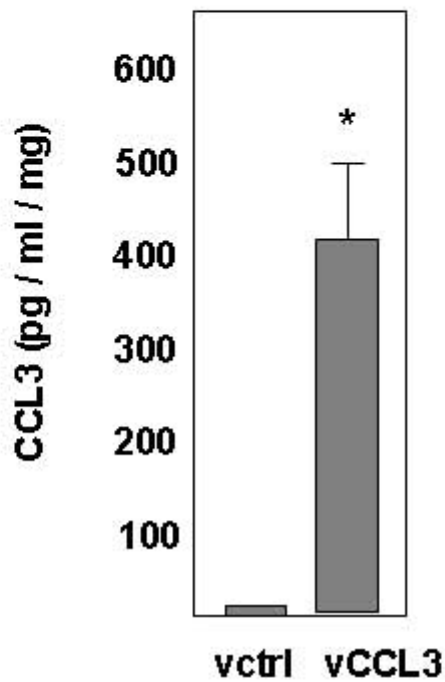

**B.**

vCCL3

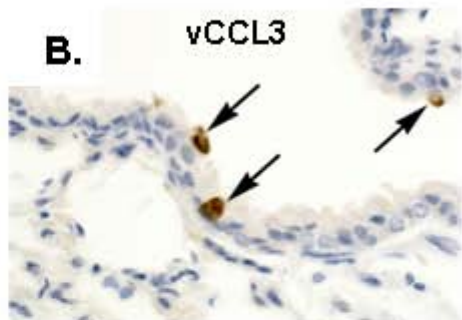

**C.**

vctrl

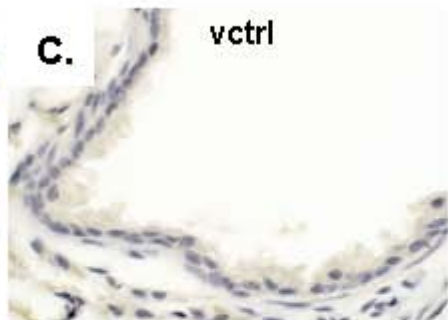

Supplement: MOESM4 [file 9427568]
